# Supplementary material for: An embryonic atrazine exposure results in reproductive dysfunction in adult zebrafish and morphological alterations in their offspring
Source: PubMed Central journal article supplement (PMC4759560; doi:10.1038/srep21337), 2016-02-19
Supplement: srep21337-s1.pdf [file srep21337-s1.pdf]

## Supplementary Material

# An embryonic atrazine exposure results in reproductive dysfunction in adult zebrafish and morphological alterations in their offspring

Sara E. Wirbisky\*, Gregory J. Weber\*, Maria S. Sepulveda\*<sup>†</sup>, Tsang-Long Lin<sup>γ</sup>, Amber S. Jannasch<sup>‡</sup>, Jennifer L. Freeman\*<sup>1</sup>

\*School of Health Sciences, <sup>†</sup>Department of Forestry and Natural Resources, <sup>γ</sup>Department of Comparative Pathobiology and <sup>‡</sup>Bindley Bioscience Center, Purdue University, West Lafayette, IN, 47907

### **Table of Contents:**

- I. Supplementary Material, Figure S1. Summary of exposure regimen and experimental analysis.
- II. Supplementary Material, Figure S2. Sex ratios of adults exposed to atrazine during embryogenesis.
- III. Supplementary Material, Figure S3. Average GSI of adult females among treatment groups.
- IV. Supplementary Material, Figure S4. Follicular staging of adult female ovaries.
- V. Supplementary Material, Table S1. Genes altered in adult female gonad tissue in all three atrazine treatments.
- VI. Supplementary Material, Table S2. Gene enrichment table in adult female gonad tissue at 0.3 ppb atrazine.
- VII. Supplementary Material, Table S3. Gene enrichment table in adult female gonad tissue at 3 ppb atrazine.
- VIII. Supplementary Material, Table S4. Gene enrichment table in adult female gonad tissue at 30 ppb atrazine.
- IX. Supplementary Material, Table S5. Primers used in qPCR confirmation of microarray analysis of female gonad tissue.

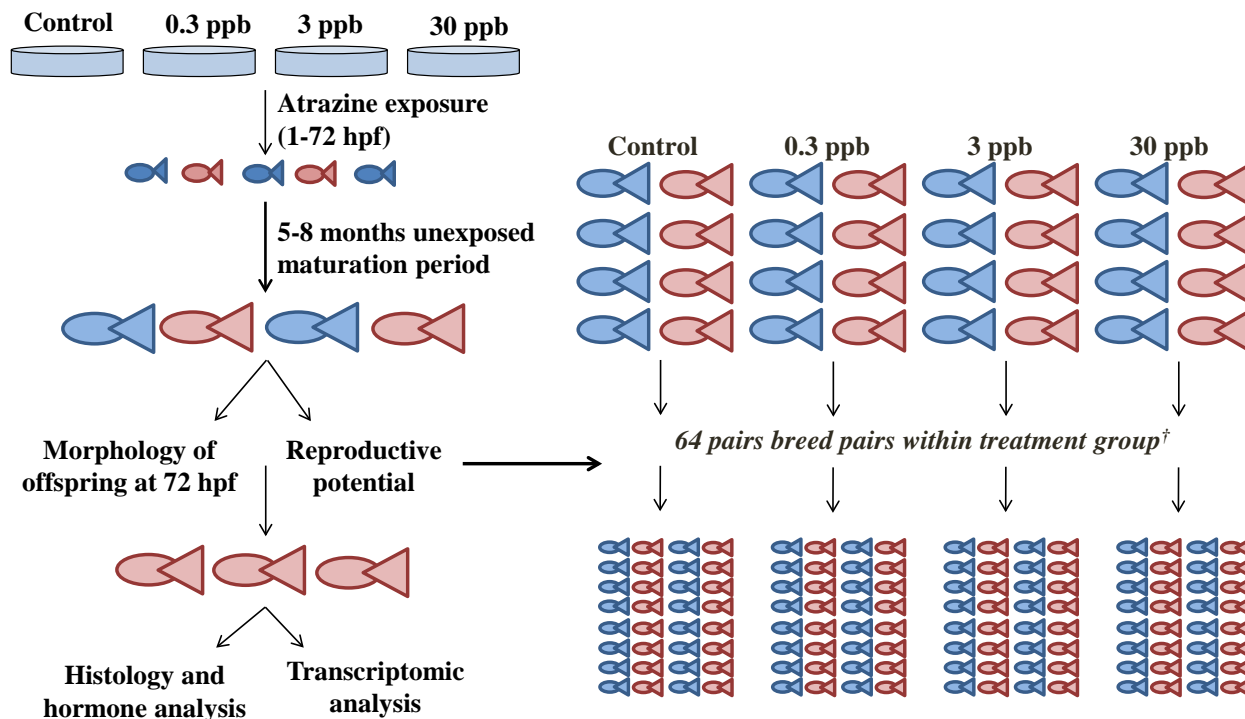

**Supplementary Material, Figure S1. Summary of exposure regimen and experimental analysis.** Zebrafish were bred and embryos were collected and treated with 0, 0.3, 3, or 30 ppb atrazine from 1-72 hpf. Following the exposure period, embryos were rinsed and allowed to mature under normal conditions until 5-8 mpf. Zebrafish were then bred for three weeks in order to initiate breeding cycles. To assess reproductive potential, single pairs were bred and number of pairs that bred, number of embryos per pair, total number of embryos per treatment, mortality, and hatching rates were assessed. In addition, offspring were collected for morphological assessment at 72 hpf. Adult female zebrafish were then collected for ovarian histology, hormone, and transcriptome analysis. (<sup>†</sup>16 pairs per replicate; 4 replicates; blue: male fish; pink: female fish)

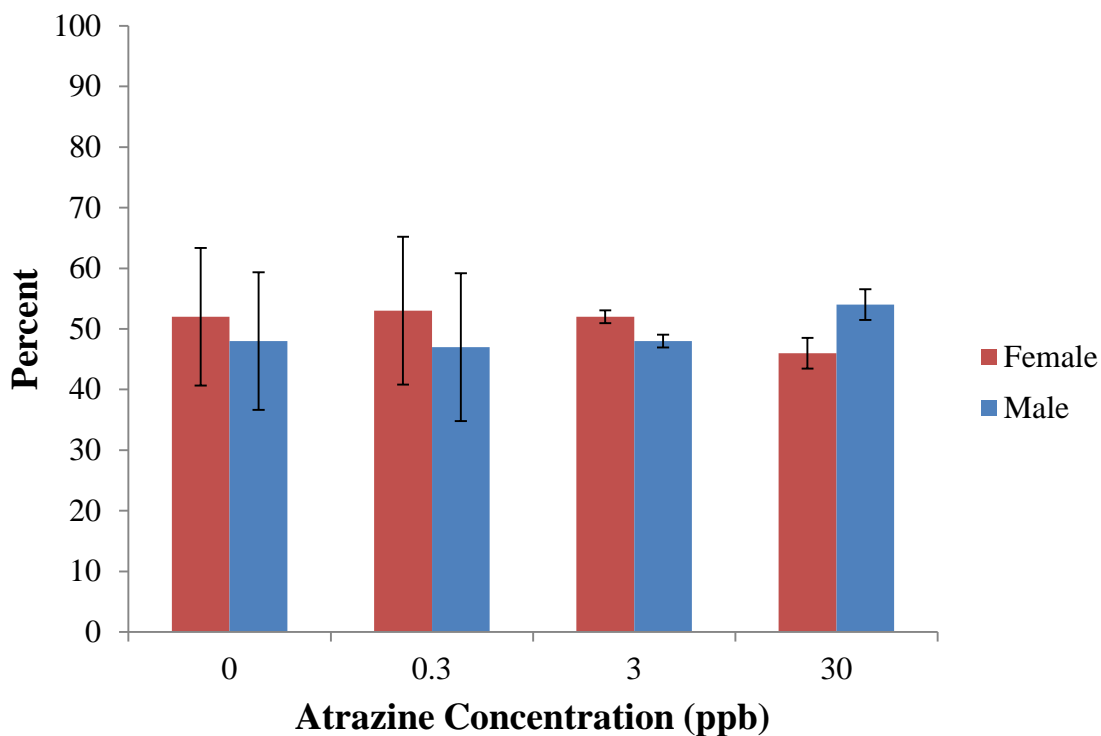

**Supplementary Material, Figure S2. Sex ratios of adults exposed to atrazine during embryogenesis.** Zebrafish were bred and embryos were collected and treated with 0, 0.3, 3, or 30 ppb atrazine from 1-72 hpf. Following the exposure period, embryos were rinsed and allowed to mature under normal conditions until 5-8 mpf. Zebrafish were then separated and counted based upon sex in order to determine sex ratios. No significant differences were observed among the treatment groups for sex ratios ( $p=0.64$ ; 4 replicates with 60-75 fish per replicate treatment). Error bars are expressed as  $\pm$  SD.

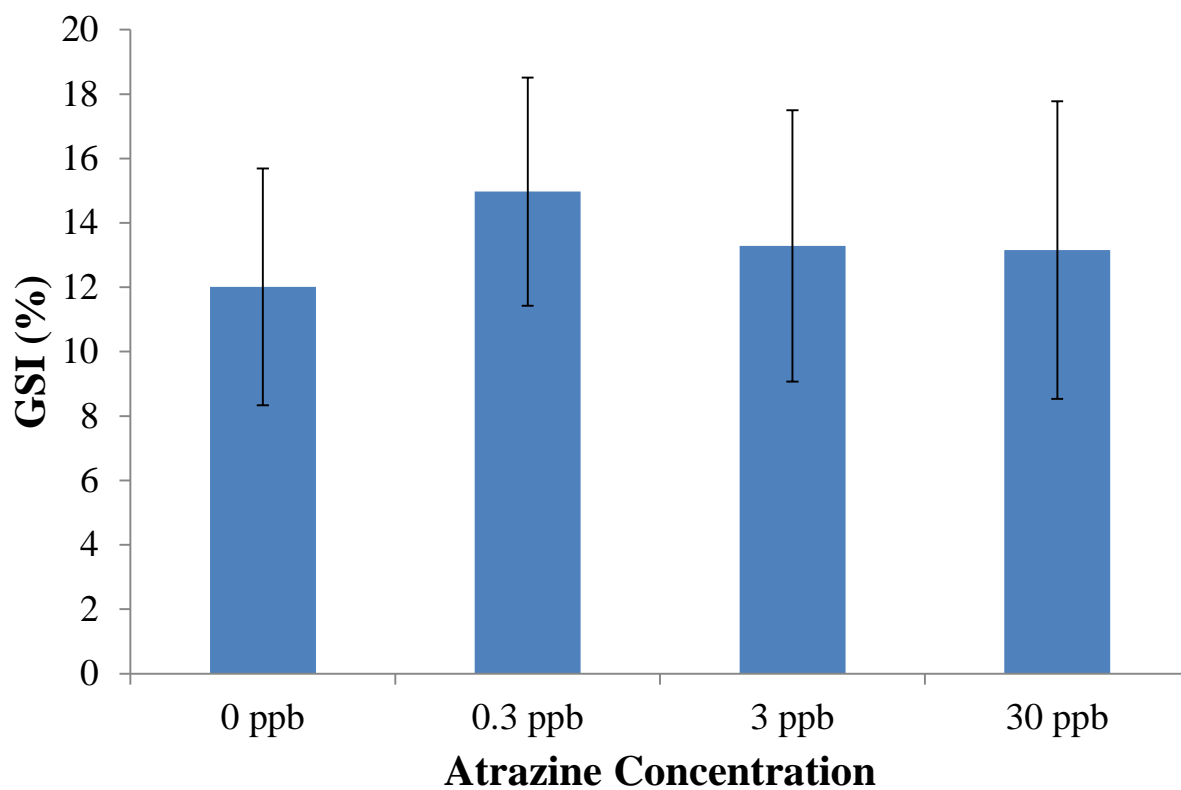

**Supplementary Material, Figure S3. Average GSI of adult females among treatment groups.** Adult female zebrafish (4 replicates with 10 fish per replicate treatment) approximately 5-8 mpf were collected from each treatment group (0, 0.3, 3, or 30 ppb atrazine), euthanized, and ovaries dissected. Zebrafish and gonads were weighed and GSI calculated. GSI among the atrazine treatment groups was not statistically different ( $p=0.11$ ). Error bars are expressed as  $\pm$  SD.

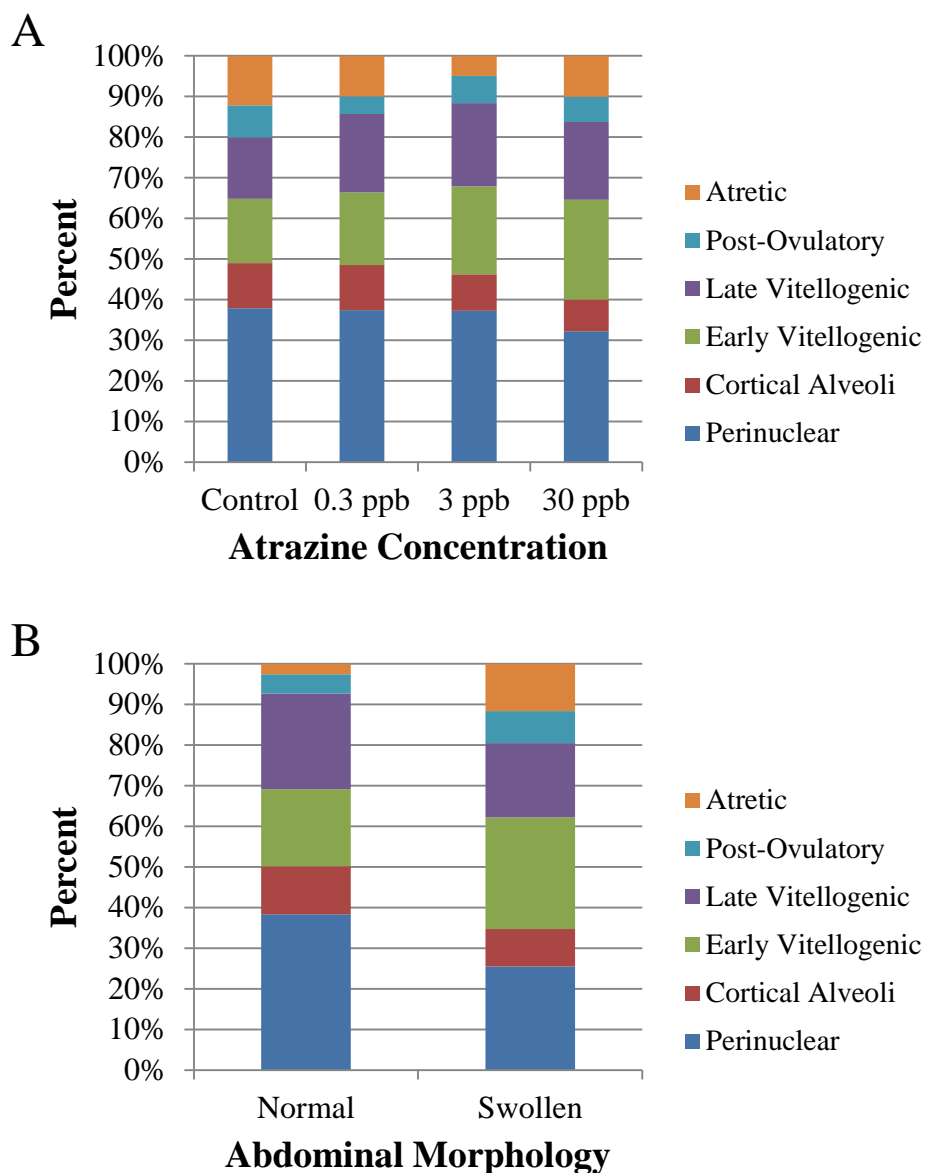

**Supplementary Material, Figure S4. Follicular staging of adult female ovaries.** Adult female zebrafish (4 replicates with 10 fish per replicate) approximately 5-8 mpf were collected from each treatment group (0, 0.3, 3, or 30 ppb atrazine), euthanized, and ovaries dissected and prepared for histological analysis. (A) The percent distribution of different oocyte stages across treatments was not significantly different from each other ( $p > 0.05$ ). (B) When comparing oocyte staging between females presenting with swollen abdomens which were unable to release eggs to normal females a significant difference was observed for the number of atretic follicles ( $p = 0.0002$ ).

**Supplementary Material, Table S1. Genes altered in adult female gonad tissue in all three atrazine treatments.**

| Gene Symbol     | Direction of Change | Log <sub>2</sub> Expression Ratio |
|-----------------|---------------------|-----------------------------------|
| <i>A2M</i>      | Down                | -1.300                            |
| <i>ABCG4</i>    | Down                | -0.621                            |
| <i>ABHD12</i>   | Down                | -0.961                            |
| <i>ACBD6</i>    | Up                  | 0.943                             |
| <i>ACE</i>      | Up                  | 1.400                             |
| <i>ACHE</i>     | Up                  | 1.549                             |
| <i>ACTL6A</i>   | Down                | -1.179                            |
| <i>ADCY8</i>    | Up                  | 0.853                             |
| <i>ADCYAP1</i>  | Up                  | 0.597                             |
| <i>ADD3</i>     | Up                  | 0.728                             |
| <i>AGA</i>      | Up                  | 0.645                             |
| <i>AK1</i>      | Up                  | 0.857                             |
| <i>ALDH2</i>    | Down                | -0.729                            |
| <i>ALDH3A2</i>  | Up                  | 0.947                             |
| <i>Aldoart1</i> | Up                  | 0.639                             |
| <i>ALKBH8</i>   | Up                  | 1.288                             |
| <i>AMPD3</i>    | Down                | -1.010                            |
| <i>ANLN</i>     | Down                | -1.154                            |
| <i>ANTXR2</i>   | Up                  | 1.270                             |
| <i>ANXA13</i>   | Up                  | 0.656                             |
| <i>AP1M2</i>    | Down                | -1.052                            |
| <i>APC2</i>     | Down                | -0.825                            |
| <i>APLP1</i>    | Up                  | 0.976                             |
| <i>AQP1</i>     | Up                  | 0.976                             |
| <i>ARFIP2</i>   | Down                | -0.851                            |
| <i>ARID3B</i>   | Down                | -0.985                            |
| <i>ARNTL2</i>   | Down                | -1.083                            |
| <i>ASIC2</i>    | Up                  | 1.542                             |
| <i>ATL3</i>     | Down                | -2.054                            |
| <i>ATP1A1</i>   | Up                  | 0.822                             |
| <i>ATP1B1</i>   | Down                | -0.699                            |
| <i>ATP6V0A2</i> | Up                  | 1.537                             |
| <i>ATP6V0C</i>  | Down                | -1.541                            |
| <i>ATP6V1B2</i> | Down                | -0.656                            |
| <i>ATPAF2</i>   | Up                  | 0.863                             |
| <i>BBS1</i>     | Down                | -1.096                            |
| <i>BBS12</i>    | Up                  | 1.567                             |
| <i>BCL11B</i>   | Down                | -0.797                            |
| <i>BET1</i>     | Up                  | 0.948                             |
| <i>BMS1</i>     | Down                | -1.899                            |

| Gene Symbol      | Direction of Change | Log <sub>2</sub> Expression Ratio |
|------------------|---------------------|-----------------------------------|
| <i>C11orf80</i>  | Down                | -2.287                            |
| <i>C12orf23</i>  | Down                | -1.068                            |
| <i>C17orf104</i> | Down                | -1.218                            |
| <i>C1orf146</i>  | Down                | -0.853                            |
| <i>C1orf198</i>  | Up                  | 0.769                             |
| <i>C9orf114</i>  | Down                | -0.632                            |
| <i>C9orf172</i>  | Up                  | 1.365                             |
| <i>CA2</i>       | Up                  | 0.959                             |
| <i>CA8</i>       | Up                  | 1.963                             |
| <i>CADM1</i>     | Down                | -1.366                            |
| <i>CALB1</i>     | Down                | -1.149                            |
| <i>CAMK2N2</i>   | Up                  | 0.813                             |
| <i>CAMK4</i>     | Up                  | 0.853                             |
| <i>CAMKV</i>     | Up                  | 0.791                             |
| <i>CARTPT</i>    | Up                  | 0.869                             |
| <i>CASP8AP2</i>  | Down                | -1.254                            |
| <i>CBLN1</i>     | Up                  | 1.170                             |
| <i>CCDC69</i>    | Down                | -0.900                            |
| <i>CCNH</i>      | Down                | -1.654                            |
| <i>CDC27</i>     | Up                  | 0.695                             |
| <i>CDCP1</i>     | Down                | -1.137                            |
| <i>CDIP1</i>     | Down                | -1.018                            |
| <i>CENPM</i>     | Up                  | 1.274                             |
| <i>CEP70</i>     | Down                | -1.146                            |
| <i>CHAF1B</i>    | Down                | -0.980                            |
| <i>CIRBP</i>     | Up                  | 0.626                             |
| <i>CKM</i>       | Up                  | 0.793                             |
| <i>CLDN7</i>     | Down                | -1.504                            |
| <i>CLIP3</i>     | Up                  | 0.736                             |
| <i>CNN3</i>      | Down                | -0.727                            |
| <i>CPE</i>       | Up                  | 0.939                             |
| <i>CRHBP</i>     | Up                  | 0.989                             |
| <i>CSPG5</i>     | Up                  | 0.973                             |
| <i>CTDSP2</i>    | Up                  | 1.097                             |
| <i>CTNND2</i>    | Up                  | 0.995                             |
| <i>CTSF</i>      | Up                  | 0.887                             |
| <i>CYP19A1</i>   | Up                  | 1.842                             |
| <i>CYP11B1</i>   | Up                  | 0.589                             |
| <i>CYP27A1</i>   | Up                  | 0.638                             |
| <i>Dclk1</i>     | Down                | -0.920                            |
| <i>DDC</i>       | Down                | -1.610                            |
| <i>DDX19A</i>    | Up                  | 0.664                             |
| <i>DDX20</i>     | Down                | -0.768                            |

| Gene Symbol     | Direction of Change | Log <sub>2</sub> Expression Ratio |
|-----------------|---------------------|-----------------------------------|
| <i>DDX4</i>     | Up                  | 0.941                             |
| <i>DEPDC1</i>   | Down                | -0.817                            |
| <i>DHX29</i>    | Down                | -1.293                            |
| <i>DNAJB4</i>   | Up                  | 0.879                             |
| <i>DNMT1</i>    | Down                | -3.820                            |
| <i>DPP7</i>     | Up                  | 1.561                             |
| <i>DPYSL3</i>   | Up                  | 0.717                             |
| <i>DRAM2</i>    | Up                  | 2.180                             |
| <i>DSPP</i>     | Up                  | 1.287                             |
| <i>DYNC1LI2</i> | Down                | -0.806                            |
| <i>EFCAB1</i>   | Down                | -0.594                            |
| <i>EIF4G1</i>   | Down                | -1.638                            |
| <i>ELAVL3</i>   | Up                  | 0.935                             |
| <i>ELFN2</i>    | Up                  | 1.477                             |
| <i>ELOVL6</i>   | Down                | -1.260                            |
| <i>EN1</i>      | Down                | -0.689                            |
| <i>ENO4</i>     | Down                | -1.873                            |
| <i>ERI1</i>     | Down                | -1.075                            |
| <i>ETNK1</i>    | Up                  | 0.819                             |
| <i>EZH2</i>     | Up                  | 0.875                             |
| <i>FAM13B</i>   | Down                | -0.970                            |
| <i>FAM184B</i>  | Down                | -0.622                            |
| <i>FAM228B</i>  | Up                  | 0.642                             |
| <i>FAM69B</i>   | Down                | -1.405                            |
| <i>FAM83D</i>   | Down                | -1.305                            |
| <i>FAM84B</i>   | Down                | -1.280                            |
| <i>FANCF</i>    | Down                | -1.332                            |
| <i>FBXO15</i>   | Down                | -1.084                            |
| <i>FDXR</i>     | Down                | -1.134                            |
| <i>FKBP1B</i>   | Up                  | 0.698                             |
| <i>FLOT2</i>    | Up                  | 0.702                             |
| <i>Folh1</i>    | Down                | -1.220                            |
| <i>FOXA1</i>    | Up                  | 0.746                             |
| <i>FOXQ1</i>    | Down                | -1.912                            |
| <i>FOXR1</i>    | Up                  | 1.011                             |
| <i>GABRA6</i>   | Up                  | 0.907                             |
| <i>GAP43</i>    | Down                | -1.300                            |
| <i>GATA6</i>    | Up                  | 0.588                             |
| <i>GDF6</i>     | Up                  | 0.927                             |
| <i>GGCT</i>     | Down                | -1.836                            |
| <i>GLB1L2</i>   | Up                  | 0.736                             |
| <i>Gm19410</i>  | Up                  | 0.749                             |
| <i>GNB2</i>     | Down                | -0.636                            |



| Gene Symbol        | Direction of Change | Log <sub>2</sub> Expression Ratio |
|--------------------|---------------------|-----------------------------------|
| <i>GNG13</i>       | Up                  | 0.770                             |
| <i>GNG3</i>        | Up                  | 0.599                             |
| <i>GP1BB</i>       | Down                | -0.825                            |
| <i>GPATCH8</i>     | Up                  | 0.591                             |
| <i>GPR157</i>      | Up                  | 0.960                             |
| <i>GPR85</i>       | Up                  | 1.097                             |
| <i>GPSM2</i>       | Up                  | 1.057                             |
| <i>GREB1L</i>      | Up                  | 0.595                             |
| <i>GRIA2</i>       | Up                  | 0.850                             |
| <i>GSAP</i>        | Down                | -1.324                            |
| <i>GSG1L</i>       | Up                  | 0.718                             |
| <i>GSR</i>         | Down                | -1.217                            |
| <i>GSS</i>         | Down                | -0.828                            |
| <i>GTSF1</i>       | Down                | -0.973                            |
| <i>H2AFV</i>       | Up                  | 1.524                             |
| <i>H2AFY2</i>      | Up                  | 1.375                             |
| <i>HBE1</i>        | Down                | -0.735                            |
| <i>HBZ</i>         | Up                  | 1.065                             |
| <i>HIF3A</i>       | Down                | -1.078                            |
| <i>HMBS</i>        | Down                | -0.810                            |
| <i>HPGD</i>        | Up                  | 0.806                             |
| <i>HTRA1</i>       | Up                  | 1.031                             |
| <i>IFFO1</i>       | Up                  | 0.692                             |
| <i>IGF2BP2</i>     | Down                | -0.784                            |
| <i>IGFBP1</i>      | Up                  | 0.732                             |
| <i>IGSF9B</i>      | Up                  | 0.921                             |
| <i>INSM1</i>       | Down                | -0.909                            |
| <i>Iqcd</i>        | Down                | -0.754                            |
| <i>IQCJ-SCHIP1</i> | Up                  | 0.674                             |
| <i>ISLR2</i>       | Up                  | 1.051                             |
| <i>ISY1-RAB43</i>  | Down                | -1.445                            |
| <i>ITGB5</i>       | Up                  | 0.833                             |
| <i>KCNA1</i>       | Up                  | 0.940                             |
| <i>KCNA4</i>       | Up                  | 0.653                             |
| <i>KCNIP3</i>      | Down                | -1.433                            |
| <i>KIF1A</i>       | Down                | -0.881                            |
| <i>KIF20B</i>      | Down                | -0.597                            |
| <i>KIF23</i>       | Down                | -1.118                            |
| <i>KL</i>          | Down                | -1.542                            |
| <i>KLHDC10</i>     | Up                  | 0.705                             |
| <i>KMO</i>         | Down                | -1.740                            |
| <i>KPNA7</i>       | Up                  | 0.739                             |
| <i>KRT17</i>       | Up                  | 0.829                             |

| Gene Symbol      | Direction of Change | Log <sub>2</sub> Expression Ratio |
|------------------|---------------------|-----------------------------------|
| <i>LICAM</i>     | Up                  | 0.587                             |
| <i>LDLRAP1</i>   | Down                | -0.619                            |
| <i>LEPREL4</i>   | Down                | -0.652                            |
| <i>LNX1</i>      | Up                  | 1.349                             |
| <i>LOC680121</i> | Up                  | 1.742                             |
| <i>LRRC8D</i>    | Up                  | 1.209                             |
| <i>LRRN3</i>     | Up                  | 0.616                             |
| <i>LRRTM2</i>    | Up                  | 0.655                             |
| <i>MAB21L1</i>   | Up                  | 1.220                             |
| <i>MAF</i>       | Up                  | 0.883                             |
| <i>MAP2K5</i>    | Up                  | 0.750                             |
| <i>MAPK11</i>    | Up                  | 0.759                             |
| <i>MARVELD2</i>  | Down                | -0.944                            |
| <i>MBD3</i>      | Up                  | 0.680                             |
| <i>MC2R</i>      | Down                | -1.095                            |
| <i>MCOLN2</i>    | Up                  | 0.666                             |
| <i>MED6</i>      | Up                  | 0.928                             |
| <i>MEF2A</i>     | Down                | -1.186                            |
| <i>METTL20</i>   | Down                | -0.690                            |
| <i>METTL8</i>    | Up                  | 0.647                             |
| <i>MGAT5</i>     | Down                | -1.195                            |
| <i>MGST1</i>     | Up                  | 0.699                             |
| <i>MSI1</i>      | Up                  | 0.694                             |
| <i>MTA3</i>      | Down                | -0.820                            |
| <i>MTMR1</i>     | Down                | -1.147                            |
| <i>MTX3</i>      | Up                  | 0.791                             |
| <i>MYT1L</i>     | Up                  | 1.233                             |
| <i>NAF1</i>      | Down                | -0.870                            |
| <i>NAT8L</i>     | Up                  | 2.412                             |
| <i>NCAPH2</i>    | Up                  | 1.275                             |
| <i>NDRG2</i>     | Up                  | 0.959                             |
| <i>NDRG3</i>     | Up                  | 0.975                             |
| <i>NDRG4</i>     | Up                  | 1.072                             |
| <i>NDUFA4</i>    | Down                | -0.671                            |
| <i>NDUFS8</i>    | Down                | -0.629                            |
| <i>NEFL</i>      | Down                | -0.588                            |
| <i>NEGR1</i>     | Down                | -1.442                            |
| <i>NEK2</i>      | Down                | -1.622                            |
| <i>NELFCD</i>    | Up                  | 0.746                             |
| <i>NEUROD1</i>   | Up                  | 0.716                             |
| <i>NEUROD2</i>   | Down                | -1.143                            |
| <i>NIM1K</i>     | Down                | -1.139                            |
| <i>NMRK1</i>     | Up                  | 1.163                             |

| Gene Symbol     | Direction of Change | Log <sub>2</sub> Expression Ratio |
|-----------------|---------------------|-----------------------------------|
| <i>NOVA1</i>    | Down                | -0.862                            |
| <i>NPC2</i>     | Down                | -0.754                            |
| <i>NPTX1</i>    | Down                | -0.825                            |
| <i>NRG2</i>     | Down                | -1.586                            |
| <i>Nrxn3</i>    | Down                | -1.363                            |
| <i>NSL1</i>     | Up                  | 1.280                             |
| <i>NUF2</i>     | Down                | -1.028                            |
| <i>ODF3</i>     | Up                  | 1.975                             |
| <i>OGG1</i>     | Up                  | 0.644                             |
| <i>Olf146</i>   | Down                | -0.674                            |
| <i>OSBPL11</i>  | Down                | -1.088                            |
| <i>OSTF1</i>    | Down                | -1.176                            |
| <i>P2RX4</i>    | Down                | -1.348                            |
| <i>PANK1</i>    | Down                | -0.813                            |
| <i>PAQR4</i>    | Down                | -0.732                            |
| <i>PCDH19</i>   | Up                  | 0.721                             |
| <i>PCDH7</i>    | Down                | -0.654                            |
| <i>PCDHAC2</i>  | Down                | -0.995                            |
| <i>PCDHGA12</i> | Up                  | 2.398                             |
| <i>PCLO</i>     | Up                  | 0.814                             |
| <i>PCMT1</i>    | Up                  | 0.953                             |
| <i>PCYT1A</i>   | Down                | -1.064                            |
| <i>PFAS</i>     | Down                | -1.282                            |
| <i>PHLDA2</i>   | Down                | -0.742                            |
| <i>PICK1</i>    | Down                | -0.957                            |
| <i>PIK3R1</i>   | Up                  | 1.050                             |
| <i>PIWIL1</i>   | Down                | -0.710                            |
| <i>PIWIL2</i>   | Up                  | 0.745                             |
| <i>PLP1</i>     | Down                | -1.710                            |
| <i>PLXNA4</i>   | Up                  | 0.789                             |
| <i>POLE</i>     | Up                  | 1.052                             |
| <i>POU3F3</i>   | Down                | -1.568                            |
| <i>Ppfia4</i>   | Up                  | 1.040                             |
| <i>PPP3R1</i>   | Up                  | 0.762                             |
| <i>PRIMPOL</i>  | Down                | -0.928                            |
| <i>PRTG</i>     | Up                  | 0.811                             |
| <i>PTBP1</i>    | Down                | -0.844                            |
| <i>PTGES</i>    | Up                  | 1.036                             |
| <i>PTPRD</i>    | Down                | -0.893                            |
| <i>PTPRS</i>    | Down                | -1.002                            |
| <i>PUSL1</i>    | Down                | -0.696                            |
| <i>PVALB</i>    | Down                | -1.074                            |
| <i>RAB13</i>    | Down                | -0.977                            |

| Gene Symbol     | Direction of Change | Log <sub>2</sub> Expression Ratio |
|-----------------|---------------------|-----------------------------------|
| <i>RAD52</i>    | Down                | -0.854                            |
| <i>RAD54L</i>   | Down                | -1.093                            |
| <i>RALY</i>     | Up                  | 0.861                             |
| <i>RARA</i>     | Down                | -0.656                            |
| <i>RASD1</i>    | Up                  | 1.254                             |
| <i>RASL11B</i>  | Up                  | 1.195                             |
| <i>RASSF2</i>   | Up                  | 2.522                             |
| <i>RASSF8</i>   | Up                  | 0.626                             |
| <i>RBM24</i>    | Down                | -1.566                            |
| <i>RBM26</i>    | Down                | -1.084                            |
| <i>RBM41</i>    | Down                | -1.696                            |
| <i>RBMS2</i>    | Up                  | 0.588                             |
| <i>RCAN2</i>    | Up                  | 0.774                             |
| <i>RCAN3</i>    | Up                  | 0.935                             |
| <i>RCC2</i>     | Down                | -0.710                            |
| <i>RERGL</i>    | Up                  | 0.855                             |
| <i>RGL2</i>     | Down                | -1.112                            |
| <i>RGS20</i>    | Down                | -0.663                            |
| <i>RGS7BP</i>   | Down                | -0.646                            |
| <i>RIC8A</i>    | Up                  | 0.620                             |
| <i>RIMS2</i>    | Down                | -0.776                            |
| <i>RIPK4</i>    | Up                  | 1.150                             |
| <i>RND1</i>     | Up                  | 2.020                             |
| <i>RNF217</i>   | Down                | -1.339                            |
| <i>ROBO2</i>    | Up                  | 0.723                             |
| <i>RTEL1</i>    | Down                | -0.771                            |
| <i>RUNX1T1</i>  | Up                  | 0.773                             |
| <i>SCARB1</i>   | Up                  | 1.240                             |
| <i>SCG2</i>     | Up                  | 0.618                             |
| <i>SCN8A</i>    | Up                  | 1.867                             |
| <i>SDK1</i>     | Up                  | 0.798                             |
| <i>SEPT5</i>    | Up                  | 1.854                             |
| <i>SETD6</i>    | Up                  | 0.773                             |
| <i>SEZ6L2</i>   | Up                  | 1.090                             |
| <i>SFRP1</i>    | Down                | -0.598                            |
| <i>SGCE</i>     | Up                  | 0.627                             |
| <i>SH3D19</i>   | Down                | -1.200                            |
| <i>SHD</i>      | Up                  | 1.646                             |
| <i>SLC1A2</i>   | Down                | -0.922                            |
| <i>SLC1A4</i>   | Up                  | 0.961                             |
| <i>SLC25A19</i> | Down                | -1.448                            |
| <i>Slc26a10</i> | Down                | -0.758                            |
| <i>SLC27A1</i>  | Up                  | 0.950                             |

| Gene Symbol     | Direction of Change | Log <sub>2</sub> Expression Ratio |
|-----------------|---------------------|-----------------------------------|
| <i>SLC35D1</i>  | Down                | -0.639                            |
| <i>SLC4A4</i>   | Up                  | 0.699                             |
| <i>SLC9A2</i>   | Down                | -0.681                            |
| <i>SMARCAL1</i> | Down                | -0.972                            |
| <i>SNAI1</i>    | Down                | -0.889                            |
| <i>SNAP25</i>   | Up                  | 1.482                             |
| <i>SNX12</i>    | Up                  | 0.927                             |
| <i>SNX21</i>    | Down                | -0.797                            |
| <i>SORBS3</i>   | Down                | -0.771                            |
| <i>SOX1</i>     | Down                | -1.473                            |
| <i>SOX10</i>    | Down                | -0.968                            |
| <i>SPINT1</i>   | Down                | -1.223                            |
| <i>SPSB4</i>    | Up                  | 1.053                             |
| <i>SRGAP2</i>   | Up                  | 0.702                             |
| <i>ST6GAL1</i>  | Down                | -1.162                            |
| <i>STAR</i>     | Up                  | 1.053                             |
| <i>STARSD8</i>  | Down                | -1.105                            |
| <i>STIL</i>     | Up                  | 1.561                             |
| <i>STMN2</i>    | Up                  | 0.844                             |
| <i>STOM</i>     | Down                | -0.690                            |
| <i>STX11</i>    | Up                  | 1.813                             |
| <i>SULT2B1</i>  | Up                  | 1.155                             |
| <i>SUN1</i>     | Up                  | 1.065                             |
| <i>SV2B</i>     | Down                | -0.937                            |
| <i>SVOPL</i>    | Up                  | 1.156                             |
| <i>SYCP1</i>    | Down                | -2.075                            |
| <i>SYNE1</i>    | Up                  | 1.199                             |
| <i>SYNGR3</i>   | Up                  | 1.023                             |
| <i>TAL1</i>     | Up                  | 0.993                             |
| <i>TAL2</i>     | Up                  | 1.153                             |
| <i>TBC1D15</i>  | Up                  | 0.675                             |
| <i>TDP2</i>     | Down                | -0.921                            |
| <i>TGDS</i>     | Down                | -2.044                            |
| <i>TIAL1</i>    | Down                | -0.657                            |
| <i>TJP2</i>     | Down                | -0.714                            |
| <i>TK1</i>      | Up                  | 1.367                             |
| <i>TMBIM1</i>   | Up                  | 0.994                             |
| <i>TMEM160</i>  | Down                | -0.873                            |
| <i>TMEM178B</i> | Down                | -0.964                            |
| <i>TMEM35</i>   | Down                | -0.699                            |
| <i>TMEM51</i>   | Down                | -0.889                            |
| <i>TNFRSF19</i> | Up                  | 1.258                             |
| <i>TONSL</i>    | Down                | -0.715                            |

| Gene Symbol     | Direction of Change | Log <sub>2</sub> Expression Ratio |
|-----------------|---------------------|-----------------------------------|
| <i>Tor1aip1</i> | Down                | -0.885                            |
| <i>TPPP3</i>    | Up                  | 0.749                             |
| <i>TRABD</i>    | Down                | -1.068                            |
| <i>TRAF2</i>    | Down                | -0.720                            |
| <i>TRAPPC2L</i> | Up                  | 0.838                             |
| <i>TRIM16</i>   | Up                  | 1.016                             |
| <i>TRIM35</i>   | Down                | -2.052                            |
| <i>TRPM3</i>    | Down                | -1.029                            |
| <i>TSPAN15</i>  | Down                | -1.186                            |
| <i>TSPAN2</i>   | Up                  | 2.381                             |
| <i>TTL7</i>     | Down                | -1.380                            |
| <i>TUBA1A</i>   | Up                  | 0.792                             |
| <i>TUBA3E</i>   | Up                  | 0.855                             |
| <i>TUSC3</i>    | Down                | -1.010                            |
| <i>UBE2C</i>    | Down                | -0.714                            |
| <i>UBE2J2</i>   | Up                  | 0.883                             |
| <i>UBE4A</i>    | Down                | -1.280                            |
| <i>UBR1</i>     | Down                | -1.190                            |
| <i>UHRF1</i>    | Up                  | 1.051                             |
| <i>UNC119</i>   | Down                | -1.181                            |
| <i>UNC119B</i>  | Up                  | 1.169                             |
| <i>URB2</i>     | Down                | -0.923                            |
| <i>USP44</i>    | Down                | -0.925                            |
| <i>VCAM1</i>    | Up                  | 0.713                             |
| <i>VGF</i>      | Up                  | 0.950                             |
| <i>VIM</i>      | Up                  | 0.604                             |
| <i>VIP</i>      | Down                | -0.586                            |
| <i>WBSCR27</i>  | Down                | -0.784                            |
| <i>WDR12</i>    | Down                | -1.125                            |
| <i>WDR26</i>    | Down                | -0.810                            |
| <i>WIF1</i>     | Up                  | 0.634                             |
| <i>XRCC2</i>    | Up                  | 1.054                             |
| <i>YAF2</i>     | Up                  | 0.878                             |
| <i>YRDC</i>     | Down                | -0.863                            |
| <i>YWHAG</i>    | Down                | -1.230                            |
| <i>ZC3H18</i>   | Down                | -1.519                            |
| <i>ZFPM2</i>    | Up                  | 0.629                             |
| <i>ZIC1</i>     | Down                | -0.884                            |
| <i>ZNF281</i>   | Down                | -0.791                            |
| <i>ZNF410</i>   | Up                  | 2.856                             |
| <i>ZNF598</i>   | Down                | -0.817                            |
| <i>ZNF91</i>    | Up                  | 2.208                             |

**Supplementary Material, Table S2. Genes enrichment table in adult female gonad tissue at 0.3 ppb atrazine.**

| Physiological System Development and Function – 0.3 ppb | p-value <sup>a</sup> | Number of Genes <sup>b</sup> |
|---------------------------------------------------------|----------------------|------------------------------|
| <b>NERVOUS SYSTEM DEVELOPMENT AND FUNCTION</b>          | 2.88E-26 – 3.74E-4   | 565                          |
| Morphology of CNS                                       | 5.87E-18             | 135                          |
| Neurotransmission                                       | 1.96E-22             | 120                          |
| Growth of neurites                                      | 1.72E-15             | 117                          |
| Myelination                                             | 4.44E-6              | 38                           |
| Coordination                                            | 1.94E-9              | 54                           |
| <b>EMBRYONIC DEVELOPMENT</b>                            | 2.51E-23 – 3.65E-4   | 396                          |
| Development of head                                     | 2.51E-23             | 203                          |
| Development of body axis                                | 3.33E-21             | 213                          |
| Growth of embryo                                        | 8.24E-7              | 88                           |
| <b>BEHAVIOR</b>                                         | 5.00E-25 – 1.45E-4   | 260                          |
| Behavior                                                | 5.00E-25             | 228                          |
| Cognition                                               | 2.13E-14             | 101                          |
| Learning                                                | 3.96E-13             | 94                           |
| Memory                                                  | 4.10E-6              | 48                           |
| <b>ORGANISMAL SURVIVAL</b>                              | 3.97E-32 – 1.35E-4   | 497                          |
| Organismal Death                                        | 3.97E-32             | 491                          |
| Perinatal Death                                         | 5.99E-11             | 131                          |
| Neonatal Death                                          | 2.24E-9              | 98                           |

<sup>a</sup> Derived from the likelihood of observing the degree of enrichment in a gene set of a given size by chance alone.

<sup>b</sup> Classified as being differentially expressed that relate to the specified function category; a gene may be present in more than one category.

**Supplementary Material, Table S3. Gene enrichment table of adult female gonad tissue at 3 ppb atrazine.**

| Physiological System Development and Function<br>– 3 ppb | p-value <sup>a</sup> | Number of Genes <sup>b</sup> |
|----------------------------------------------------------|----------------------|------------------------------|
| <b>NERVOUS SYSTEM DEVELOPMENT AND FUNCTION</b>           | 1.74E-15 – 1.62E-3   | 260                          |
| <b>Growth of neurites</b>                                | 2.05E-10             | 57                           |
| <b>Migration of Neurons</b>                              | 4.83E-6              | 27                           |
| <b>Morphology of CNS</b>                                 | 1.74E-15             | 73                           |
| <b>Dendritic Growth and Branching</b>                    | 5.07E-8              | 27                           |
| <b>ORGAN MORPHOLOGY</b>                                  | 1.65E-13 – 1.62E-3   | 110                          |
| <b>Abnormal morphology of gonad</b>                      | 6.52E-7              | 41                           |
| <b>Abnormal morphology of internal genitalia</b>         | 8.84E-6              | 37                           |
| <b>Mass of gonad</b>                                     | 4.01E-7              | 24                           |
| <b>Morphology of brain</b>                               | 1.65E-13             | 65                           |
| <b>BEHAVIOR</b>                                          | 5.42E-18 – 1.56E-3   | 134                          |
| <b>Behavior</b>                                          | 5.42E-18             | 113                          |
| <b>Cognition</b>                                         | 1.69E-9              | 49                           |
| <b>Learning</b>                                          | 1.78E-8              | 45                           |
| <b>Memory</b>                                            | 8.91E-5              | 25                           |
| <b>ORGANISMAL SURVIVAL</b>                               | 1.55E-18 – 3.03E-4   | 233                          |
| <b>Organismal Death</b>                                  | 1.55E-18             | 220                          |
| <b>Perinatal Death</b>                                   | 1.21E-5              | 56                           |
| <b>Neonatal Death</b>                                    | 1.25E-4              | 41                           |

<sup>a</sup> Derived from the likelihood of observing the degree of enrichment in a gene set of a given size by chance alone.

<sup>b</sup> Classified as being differentially expressed that relate to the specified function category; a gene may be present in more than one category.



**Supplementary Material, Table S4. Gene enrichment table of adult female gonad tissue at 30 ppb atrazine.**

| Physiological System Development and Function – 30 ppb | p-value <sup>a</sup> | Number of Genes <sup>b</sup> |
|--------------------------------------------------------|----------------------|------------------------------|
| <b>NERVOUS SYSTEM DEVELOPMENT AND FUNCTION</b>         | 7.61E-8 – 8.58E-3    | 184                          |
| <b>Morphology of CNS</b>                               | 3.27E-7              | 48                           |
| <b>Synaptogenesis</b>                                  | 1.39E-3              | 15                           |
| <b>Growth of neurites</b>                              | 1.67E-6              | 42                           |
| <b>Differentiation of neurons</b>                      | 7.49E-5              | 32                           |
| <b>TISSUE DEVELOPMENT</b>                              | 8.12E07 – 8.47E-3    | 152                          |
| <b>Gonadogenesis</b>                                   | 3.52E-03             | 32                           |
| <b>Development of genital organ</b>                    | 3.40E-3              | 34                           |
| <b>Gametogenesis</b>                                   | 5.46E-03             | 26                           |
| <b>Development of neurons</b>                          | 8.19E-04             | 16                           |
| <b>BEHAVIOR</b>                                        | 4.05E-10 – 6.51E-3   | 97                           |
| <b>Behavior</b>                                        | 4.05E-10             | 82                           |
| <b>Cognition</b>                                       | 3.30E-5              | 34                           |
| <b>Learning</b>                                        | 6.52E-4              | 29                           |
| <b>Locomotion</b>                                      | 4.24E-5              | 28                           |
| <b>ORGANISMAL SURVIVAL</b>                             | 5.31E-10 – 5.71E-3   | 171                          |
| <b>Organismal Death</b>                                | 5.31E-10             | 165                          |
| <b>Perinatal Death</b>                                 | 2.17E-4              | 45                           |
| <b>Neonatal Death</b>                                  | 5.85E-5              | 37                           |

<sup>a</sup> Derived from the likelihood of observing the degree of enrichment in a gene set of a given size by chance alone.

<sup>b</sup> Classified as being differentially expressed that relate to the specified function category; a gene may be present in more than one category.

**Supplementary Material, Table S5. Primers used in qPCR confirmation of microarray analysis of female gonad tissue.**

| <b>Seq. ID*</b> | <b>Gene Symbol*</b> | <b>Primer Sequence</b>                                             |
|-----------------|---------------------|--------------------------------------------------------------------|
| NM_131663.1     | <i>STAR</i>         | Forward: ATGCGACCAAGTGCAGATGA<br>Reverse: GCCATTCTGTCCCTGAGGTG     |
| XM_005169447.1  | <i>ACE</i>          | Forward: AGAGGCATGGGGTCACAAAG<br>Reverse: CTGTGATTGCGAGATTGGCG     |
| NM_131154.2     | <i>CYP19A1</i>      | Forward: CAGGGCATCATATTCAACTCAA<br>Reverse: AGGTGGTGCAGATCTCCATAGT |
| NM_001045256.1  | <i>CRHBP</i>        | Forward: GGATAACGAGATCAGCCCGG<br>Reverse: ACCCTCTACGGCCACCATAT     |
| XM_689239.5     | <i>HPGD</i>         | Forward: AGCAAGGAGGGGCAATCATC<br>Reverse: ATGGCTCGTGAAAACCCGAT     |
| NM_001045256.1  | <i>CYP11B1</i>      | Forward: CAACGGTTACCCCATTCCTCA<br>Reverse: GCCGAGTGAGAAGATGAGCA    |
| NM_001114553.2  | <i>VIP</i>          | Forward: TACCCTTCGCCTCCATGAGA<br>Reverse: TCATCACTGACCCGCTTTCC     |
| NM_181601       | <i>B-ACTIN</i>      | Forward: CTAAAAACTGGAACGGTGAAGG<br>Reverse: AGGCAAATAAGTTTCGGAACAA |

\*Seq IDs are zebrafish and gene symbols are the human homolog.
